# Supplementary material for: RNAAgeCalc: A multi-tissue transcriptional age calculator
Source: PLoS One. 2020 Aug 4;15(8):e0237006. doi: 10.1371/journal.pone.0237006 (PMC7402472; doi:10.1371/journal.pone.0237006)
Supplement: S6 Table — (XLSX) [file pone.0237006.s006.xlsx]

## Sheet: Sheet1
(i) train on each GTEx tissue, test on dermal fibroblast data																(ii) train on dermal fibroblast data, test on each GTEx tissue
elastic net							ensemble LDA									elastic net							ensemble LDA
tissue	signature	Pearson_cor	Spearman_cor	median_error	mean_error		tissue	signature	Pearson_cor	Spearman_cor	median_error	mean_error				tissue	signature	Pearson_cor	Spearman_cor	median_error	mean_error		tissue	signature	Pearson_cor	Spearman_cor	median_error	mean_error
adipose_tissue	DESeq2	0.529341	0.51304	21.6717	21.7161		adipose_tissue	DESeq2	0.0278113	-0.0394202	27	26.2105				adipose_tissue	DESeq2						adipose_tissue	DESeq2
	Pearson	0.641778	0.633004	21.9978	24.7432			Pearson	0.366946	0.3443	25	23.8045					Pearson	0.231471	0.214889	25.0724	26.8104			Pearson	-0.00164003	-0.054803	21	22.6548
	Dev	0.180458	0.181441	27.4318	30.6076			Dev	0.134278	0.0848247	23	30.9474					Dev	-0.0896435	-0.0950577	15.9509	18.2356			Dev	-0.00541917	-0.111778	29	30.6904
	deMagalhaes	0.331423	0.332788	25.2856	24.197			deMagalhaes	0.299291	0.303096	26	26.4211					deMagalhaes	-0.0713239	-0.0959481	251.64	262.322			deMagalhaes	-0.00609277	-0.0222265	52	47.1491
	GenAge	0.143344	0.121645	55.9803	55.5033			GenAge			29	26.188					GenAge	0.0150515	0.0803563	89.4193	90.4877			GenAge	-0.0129445	0.0659078	26	27.893
	GTExAge	0.545226	0.523352	21.4657	21.4443			GTExAge	0.163518	0.0505499	28	25.6917					GTExAge	0.164346	0.145785	169.876	237.87			GTExAge	-0.0224619	-0.017728	27	31.6921
	Peters	0.129097	0.0773499	28.3849	32.5588			Peters	0.112505	-0.0639178	28	25.9774					Peters	-0.130575	-0.127646	810.6	833.9			Peters	0.106587	0.129238	18	19.6045
	all	0.57971	0.55234	22.1156	25.4023			all									all	0.0857266	0.0664378	74.8799	75.4426			all
adrenal_gland	DESeq2	0.30578	0.300129	20.9899	26.725		adrenal_gland	DESeq2	-0.0246255	0.0478846	25	32.0902				adrenal_gland	DESeq2						adrenal_gland	DESeq2
	Pearson	0.32128	0.303137	43.0088	44.7442			Pearson	0.152712	0.0612662	24	26.7293					Pearson	0.228621	0.204931	18.0028	20.4151			Pearson	-0.117203	-0.154794	33	33.6329
	Dev	0.191227	0.16808	28	25.3123			Dev			25	32.0977					Dev	0.00179859	-0.0196381	59.8596	61.6671			Dev	-0.11747	-0.086306	31.5	32.9494
	deMagalhaes	0.0451482	0.0240979	25.6484	25.2875			deMagalhaes	-0.0418102	-0.0441167	25	31.6541					deMagalhaes	-0.0547137	-0.080108	149.716	164.563			deMagalhaes			51.5	50.1392
	GenAge	-0.210351	-0.227208	30.4375	31.5809			GenAge	0.0226336	0.0377665	29	26.0301					GenAge	0.0771022	0.0467989	78.0115	75.9862			GenAge	-0.11978	-0.252272	29	30.057
	GTExAge	0.337983	0.318872	73.3904	75.3713			GTExAge	0.407894	0.411417	29	25.6692					GTExAge	0.0581383	-0.0347369	304.638	290.375			GTExAge	-0.0482079	-0.0668881	21.5	28.8544
	Peters	0.155011	0.157616	29.4787	32.4634			Peters	-0.0731549	-0.0729831	27	26.4887					Peters	0.11119	0.09851	390.399	393.68			Peters	0.0333794	0.0947481	12	15.7595
	all	0.242867	0.233478	23.1284	27.5657			all									all	0.0675051	0.0514888	16.9986	19.0648			all
blood	DESeq2	-0.464459	-0.462737	27.1933	31.0876		blood	DESeq2	0.293256	0.31649	28	26.0301				blood	DESeq2						blood	DESeq2
	Pearson	-0.00234427	0.0103754	25.2349	25.9238			Pearson	0.349097	0.352987	28	25.8195					Pearson	-0.0676095	-0.0533452	86.4508	89.7856			Pearson	0.00866939	0.00725536	38	38.3727
	Dev	-0.32689	-0.348325	28.58	27.7853			Dev	-0.210879	-0.198781	28	28.2932					Dev	-0.110556	-0.127443	54.2301	52.8481			Dev	-0.0638188	-0.073921	34	36.0961
	deMagalhaes	-0.268436	-0.277661	28.8785	26.4463			deMagalhaes	0.0551703	0.0752943	28	25.9023					deMagalhaes	0.0263115	0.00803023	985.285	882.94			deMagalhaes	-0.00300624	-0.111571	10	16.118
	GenAge	-0.465052	-0.477909	29.7126	29.554			GenAge			29	26.0602					GenAge	-0.0135831	-0.0543277	116.213	119.986			GenAge	-0.0254729	-0.0766484	29	30.3727
	GTExAge	0.239022	0.232782	25.2664	25.9431			GTExAge	0.138213	0.151252	28	25.9398					GTExAge	0.189061	0.224496	191.433	184.852			GTExAge	0.10153	0.16805	51	48.3761
	Peters	0.185042	0.150575	29.0974	29.1384			Peters	0.324266	0.371505	28	25.9925					Peters	-0.0883524	-0.0871041	1513.76	1541.32			Peters	0.0626505	-0.0471649	19	21.7926
	all	0.254484	0.25078	26.4913	24.6881			all									all	-0.144458	-0.1408	18.6587	22.8267			all
blood_vessel	DESeq2	0.172226	0.147916	23.4067	28.0655		blood_vessel	DESeq2	-0.196722	-0.246229	28	26.2105				blood_vessel	DESeq2						blood_vessel	DESeq2
	Pearson	0.160374	0.133745	24.6143	32.4835			Pearson	0.0551501	-0.192799	27	25.8947					Pearson	0.192507	0.179805	30.691	32.1075			Pearson	-0.0802942	-0.114806	18	20.8592
	Dev	0.572711	0.59603	21.4336	29.0405			Dev	0.316656	0.438871	21	26.2707					Dev	-0.0959852	-0.112841	25.573	28.4709			Dev	-0.140686	-0.251079	29	31.7172
	deMagalhaes	0.0162147	0.0102198	25.0043	32.1927			deMagalhaes	-0.191683	-0.204555	28	26.4586					deMagalhaes	0.00408135	-0.0261393	123.452	153.245			deMagalhaes	0.0115908	-0.00673135	53	49.6635
	GenAge	-0.231389	-0.20401	26.2806	28.9741			GenAge	-0.349261	-0.366101	29	26.2556					GenAge	0.0425199	0.024356	81.0073	81.2668			GenAge	-0.00910016	-0.0421807	29	30.9209
	GTExAge	0.345784	0.29434	24.934	24.5003			GTExAge	-0.046158	0.146658	28	26.5414					GTExAge	0.237161	0.243876	111.986	130.164			GTExAge	-0.0671799	-0.0895772	26	32.3928
	Peters	0.527461	0.511979	32.3186	36.0474			Peters	0.133414	0.128524	28	26.1579					Peters	0.105029	0.133861	290.984	391.684			Peters	0.0732767	0.0962176	17	18.0603
	all	0.661873	0.655007	16.6796	23.5784			all									all	0.168888	0.167498	61.4452	62.0636			all
brain	DESeq2	0.327266	0.319191	31.4248	34.4017		brain	DESeq2	-0.0274328	-0.170918	28	26.7669				brain	DESeq2						brain	DESeq2
	Pearson	0.0320267	0.022483	23.2945	26.875			Pearson	0.0226745	0.0118029	27	26.812					Pearson	0.155873	0.183314	25.749	27.7331			Pearson	0.136848	0.148209	54	45.2418
	Dev	0.0942871	0.0385142	26.6613	29.1248			Dev	0.124122	0.0980094	24	25.2932					Dev	0.120993	0.134189	62.1631	63.166			Dev	0.190556	0.193189	41	40.1348
	deMagalhaes	-0.165758	-0.168976	59.8186	60.0325			deMagalhaes	-0.341554	-0.385283	28	26.1429					deMagalhaes	0.0390277	0.098809	343.831	340.039			deMagalhaes	-0.0349082	-0.0406012	59	56.4066
	GenAge	0.439132	0.417751	86.7557	85.156			GenAge	0.22105	0.220645	27	26.7218					GenAge	0.0396992	0.0317078	82.7761	102.963			GenAge	-0.0118735	0.0447825	34	31.9743
	GTExAge	0.533197	0.532783	44.7821	41.6756			GTExAge	0.392887	0.408911	28	25.8947					GTExAge	0.109847	0.0915415	667.838	645.047			GTExAge	0.107374	0.095445	51	41.7989
	Peters	0.328869	0.325523	69.0515	70.1739			Peters	0.445932	0.45357	27	26.4887					Peters	-0.0215876	0.0561575	471.223	532.013			Peters	-0.0567744	-0.0303733	17	18.9964
	all	0.460569	0.453336	21.8444	27.0704			all									all	0.0447913	0.0410803	83.428	83.7498			all
breast	DESeq2	0.0634515	0.135615	23.359	28.7501		breast	DESeq2	-0.159638	-0.0942265	25	26.6692				breast	DESeq2						breast	DESeq2
	Pearson	0.259656	0.294226	23.9047	24.1692			Pearson	-0.0674583	0.144497	26	25.782					Pearson	0.282901	0.271332	18.1482	20.3558			Pearson	-0.00889958	-0.0230056	17	18.3548
	Dev	0.449454	0.450196	21.6341	28.0538			Dev	0.28715	0.264323	24	25.9549					Dev	-0.00840323	-0.00792026	15.9504	19.7177			Dev	-0.155822	-0.203913	29	31.4378
	deMagalhaes	0.480046	0.51539	25.7845	25.4533			deMagalhaes	0.384568	0.444852	23	27.6241					deMagalhaes	-0.0165739	-0.0249423	145.384	172.794			deMagalhaes			52	49.871
	GenAge	-0.371364	-0.331115	43.5733	42.8651			GenAge	-0.0784432	-0.0593665	29	26.0827					GenAge	0.129225	0.148174	51.6898	51.2796			GenAge	0.011936	0.0312724	22	24.8111
	GTExAge	0.583751	0.553843	27.0584	30.9192			GTExAge	0.408722	0.470625	24	24.7744					GTExAge	0.243852	0.252364	176.677	212.341			GTExAge	0.0380103	0.0334901	42	37.3502
	Peters	0.360955	0.337666	29.4643	32.1613			Peters	0.243465	0.218393	26	25.3985					Peters	-0.0169182	-0.0167089	627.293	655.905			Peters	-0.0772802	0.0291476	22	23.53
	all	0.218377	0.211161	23.8716	26.9988			all									all	0.179832	0.176087	63.1042	62.119			all
colon	DESeq2	-0.0343	-0.0633825	24.3376	28.9008		colon	DESeq2	0.0926235	0.0682874	24	27.5263				colon	DESeq2						colon	DESeq2
	Pearson	0.268477	0.264411	26.7113	31.0346			Pearson	0.253399	0.220392	24	25.8496					Pearson	0.211104	0.237059	47.3838	47.4613			Pearson	0.0826637	-0.112988	30	30.4144
	Dev	-0.235004	-0.29006	28.2495	27.2922			Dev	0.129322	-0.17845	22	27.7444					Dev	-0.124478	-0.128555	43.144	42.7721			Dev	-0.152044	-0.220052	31	32.3182
	deMagalhaes	-0.130853	-0.119704	26.3008	25.9251			deMagalhaes	-0.205045	0.063178	25	29.218					deMagalhaes	-0.307803	-0.323942	199.456	220.124			deMagalhaes	-0.082533	-0.0926366	48	42.0241
	GenAge	0.128714	0.126949	78.4832	77.9916			GenAge	0.206859	0.225878	29	26.0376					GenAge	-0.282504	-0.308456	40.1173	47.3853			GenAge	-0.0280838	-0.0173808	28	29.9064
	GTExAge	0.493356	0.467684	23.3757	22.7866			GTExAge	-0.291644	-0.303488	28	25.9474					GTExAge	-0.105963	-0.127713	305.708	301.385			GTExAge	0.17874	0.182533	42.5	37.5027
	Peters	0.143769	0.156429	24.2915	25.1579			Peters	0.397871	0.39757	29	25.9173					Peters	-0.220936	-0.211519	555.603	746.872			Peters	0.279855	0.319067	14	16.246
	all	0.202483	0.144222	25.1335	25.1775			all									all	0.24029	0.261303	91.4382	93.915			all
esophagus	DESeq2	0.298992	0.279284	23.8406	24.8645		esophagus	DESeq2	0.0912328	0.134346	26	25.5338				esophagus	DESeq2						esophagus	DESeq2
	Pearson	0.40944	0.373535	29.8458	30.9021			Pearson	0.103203	0.169375	26	25.5564					Pearson	0.203196	0.222955	51.8576	52.2986			Pearson	0.127693	0.0781385	31	32.9339
	Dev	0.476978	0.459084	22.4375	23.4302			Dev	0.340444	0.347571	25	24.7669					Dev	0.0889053	0.0655761	35.8374	35.6934			Dev	-0.0234344	-0.163115	31	32.3355
	deMagalhaes	0.119943	0.105287	23.9477	25.6954			deMagalhaes	0.0582359	0.011398	28	25.7744					deMagalhaes	-0.0902551	-0.104819	111.146	127.719			deMagalhaes	0.00356289	0.00822264	49	45.1995
	GenAge	0.110529	0.121931	22.6867	25.1698			GenAge			28	25.9323					GenAge	-0.00663841	0.0160943	35.7067	42.3394			GenAge	-0.0510471	-0.11703	30	32.3545
	GTExAge	0.489211	0.487582	19.3458	21.4667			GTExAge	0.22858	0.237197	28	25.7444					GTExAge	0.0361813	0.0369173	191.428	189.715			GTExAge	-0.0598125	-0.0539298	43	37.9225
	Peters	0.1197	0.10054	25.3321	30.5592			Peters	0.111703	0.0636759	28	25.9398					Peters	-0.0401485	-0.0606362	240.522	288.961			Peters	0.03667	0.0679681	22	23.8323
	all	0.494786	0.473289	24.5271	22.9044			all									all	0.152938	0.147209	91.103	93.5863			all
heart	DESeq2	0.165237	0.189446	23.7912	27.6473		heart	DESeq2	-0.0978389	-0.0725716	28	26.1278				heart	DESeq2						heart	DESeq2
	Pearson	-0.116824	-0.104882	40.2463	41.8644			Pearson	-0.122944	-0.164301	28	26.7368					Pearson	0.130735	0.148915	39.8695	41.2707			Pearson	-0.0446716	-0.10059	26	26.7741
	Dev	0.0948785	0.0836486	27.4601	25.8513			Dev	0.0215197	-0.113442	25	25.7744					Dev	0.0984269	0.0715798	73.1145	72.336			Dev	0.00615459	-0.102104	29	30.4682
	deMagalhaes	0.0801964	0.077929	24.3985	25.175			deMagalhaes	0.0812421	-0.0188417	28	26.2331					deMagalhaes	-0.125763	-0.140187	123.2	135.095			deMagalhaes	0.00348445	-0.0117655	53	51.0862
	GenAge	-0.0130864	-0.0177634	26.8632	28.1474			GenAge			29	26.188					GenAge	0.129934	0.161803	61.2209	122.541			GenAge	-0.0848158	-0.169703	29	30.1622
	GTExAge	0.364157	0.345187	72.9733	75.065			GTExAge	0.222469	0.27127	25	25.3985					GTExAge	0.0420686	0.0179663	100.124	115.694			GTExAge	0.0114151	-0.0623906	8	9.71458
	Peters	-0.183227	-0.164876	26.6231	27.8123			Peters	-0.217674	-0.23349	29	26.1729					Peters	0.00850494	0.0126868	166.191	223.813			Peters	0.114002	0.147658	11	11.9651
	all	0.482985	0.471459	21.4929	24.4935			all									all	0.0472688	0.05291	75.2258	76.1696			all
liver	DESeq2	0.691281	0.69497	20.9081	23.5871		liver	DESeq2	0.107499	0.098741	27	25.9925				liver	DESeq2						liver	DESeq2
	Pearson	0.698363	0.718198	25.4973	27.5258			Pearson	0.333674	0.308084	22	24.2556					Pearson	0.241585	0.254017	15.2002	19.7713			Pearson	0.107401	0.0565953	30	31.0662
	Dev	0.280446	0.296379	22.4554	29.0741			Dev	0.476506	0.389639	17	23.6541					Dev	0.286808	0.265132	16.3228	19.9086			Dev	0.00143579	-0.0862797	28	29.5588
	deMagalhaes	-0.247072	-0.280853	27.9698	26.5202			deMagalhaes	-0.0935915	-0.099604	29	26.2331					deMagalhaes	-0.295862	-0.314367	243.907	229.49			deMagalhaes			53.5	52.2059
	GenAge	0.447597	0.416876	20.4623	24.3804			GenAge	0.319497	0.331809	28	25.9699					GenAge	-0.0422688	0.0829701	49.3506	154.365			GenAge	0.160894	0.0959283	25	25.6618
	GTExAge	0.696515	0.70155	21.4321	25.7531			GTExAge	0.381845	0.393525	25	23.9624					GTExAge	-0.0502931	-0.0445719	134.97	133.361			GTExAge	0.0475326	0.0289703	17	27.7721
	Peters	0.567355	0.554654	23.4082	23.4758			Peters	0.374556	0.377417	26	25.4286					Peters	-0.060033	-0.00285289	346.34	355.575			Peters	0.15344	0.11221	20.5	20.7721
	all	0.704387	0.713066	20.8645	20.7254			all									all	0.314389	0.291885	61.8815	64.1131			all
lung	DESeq2	0.716928	0.718163	19.3303	20.1544		lung	DESeq2	0.407661	0.266687	25	23.9925				lung	DESeq2						lung	DESeq2
	Pearson	0.776443	0.78505	18.123	20.604			Pearson	0.440897	0.574526	28	25.2782					Pearson	0.098893	0.0817629	51.1954	52.4108			Pearson	-0.16468	-0.19042	31	32.5618
	Dev	0.702256	0.711193	20.5944	20.8506			Dev	0.533557	0.548393	23	24.5489					Dev	0.0175702	-0.0129988	30.1182	29.9456			Dev	-0.193065	-0.233072	28	29.836
	deMagalhaes	0.474002	0.476595	22.1762	23.6831			deMagalhaes	0.214074	0.227518	27	26.3534					deMagalhaes	-0.213533	-0.207937	326.818	326.422			deMagalhaes	-0.1452	-0.133382	50	44.9086
	GenAge	0.39145	0.388341	29.9442	30.9648			GenAge	0.249538	0.25266	27	26.3233					GenAge	0.0815054	0.114735	78.3742	73.7349			GenAge	-0.0546836	0.0380647	27	29.1667
	GTExAge	0.761097	0.774507	20.9621	25.0648			GTExAge	0.561801	0.586107	24	22.812					GTExAge	0.299933	0.304005	243.393	279.254			GTExAge	0.0181016	0.0163787	50	45.5833
	Peters	0.674066	0.678034	20.8405	24.4356			Peters	0.455944	0.512086	24	22.9248					Peters	0.138517	0.116982	1163.07	1163.74			Peters	-0.0409327	0.0822911	24	25.7016
	all	0.518042	0.500575	21.8764	21.4776			all									all	0.128646	0.105463	90.3906	91.2805			all
muscle	DESeq2	0.311172	0.328456	26.636	29.6833		muscle	DESeq2	0.520715	0.529544	26	25.9624				muscle	DESeq2						muscle	DESeq2
	Pearson	0.144948	0.136699	37.0244	36.7638			Pearson	0.103137	0.0541103	28	26.203					Pearson	0.121855	0.105357	20.9765	23.6045			Pearson	0.034234	0.0622087	50	46.4841
	Dev	0.33284	0.407424	26.2106	24.518			Dev	0.0423739	0.174482	25	27.0376					Dev	-0.0872625	-0.106478	71.8747	71.399			Dev	0.015317	0.0587131	45	42.6004
	deMagalhaes	0.372461	0.381946	22.6205	23.8517			deMagalhaes	0.0116304	-0.0323549	29	26.0451					deMagalhaes	-0.105582	-0.151549	116.575	119.284			deMagalhaes	-0.0520748	0.06133	53	50.3573
	GenAge	0.265707	0.262382	23.026	24.7235			GenAge	0.118043	0.142652	28	26.2406					GenAge	-0.0362573	-0.0503754	59.2007	61.5866			GenAge	0.0439271	0.0546273	36	34.5941
	GTExAge	0.10215	0.10578	30.5087	31.1866			GTExAge	-0.0585919	-0.113237	28	26.3759					GTExAge	0.129649	0.15084	40.4415	70.316			GTExAge	0.0580289	0.0660705	50	43.5772
	Peters	0.472544	0.434295	21.6624	25.3765			Peters	0.049177	0.0566779	28	25.9474					Peters	-0.0387779	-0.0297477	40.0914	60.8493			Peters	0.0501059	-0.00155547	10	10.8922
	all	0.365209	0.374576	44.1735	39.1192			all									all	0.0686009	0.147014	48.3305	50.4819			all
nerve	DESeq2	0.687662	0.686001	24.4858	31.1819		nerve	DESeq2	0.271039	0.323038	20	23.8195				nerve	DESeq2						nerve	DESeq2
	Pearson	0.6574	0.650196	29.4939	34.1813			Pearson	-0.00113647	-0.249463	21	28.3534					Pearson	0.258761	0.242964	28.6885	30.2376			Pearson	0.0264563	-0.00169635	27	28.3483
	Dev	0.0137616	0.0354682	24.6024	25.9127			Dev	-0.175796	-0.16658	27	30.6165					Dev	-0.0869401	-0.0999913	17.9345	20.6337			Dev	0.0626317	-0.127105	28	30.7327
	deMagalhaes	0.0113082	0.00589819	24.9648	28.2212			deMagalhaes	0.0655662	0.0311787	27	25.6466					deMagalhaes	-0.00556667	-0.0292696	80.4713	95.2432			deMagalhaes	0.0274976	0.0134619	52	47.1291
	GenAge	0.346042	0.360779	20.4502	23.9047			GenAge			29	26.188					GenAge	-0.0788763	-0.0726497	48.5271	50.1831			GenAge	-0.063749	0.0382368	24	26.7117
	GTExAge	0.54516	0.531597	32.0545	31.9743			GTExAge	0.564452	0.56817	27	25.1504					GTExAge	0.210109	0.236987	228.743	226.338			GTExAge	-0.095086	-0.0661196	52	48.2883
	Peters	-0.189722	-0.177795	41.1932	46.5929			Peters	0.196575	0.16049	28	25.609					Peters	0.185486	0.152249	750.798	754.948			Peters	0.0182511	0.0397559	22	24.8078
	all	0.564973	0.528431	16.9668	21.4009			all									all	0.177694	0.168693	59.3181	60.1531			all
ovary	DESeq2	0.480515	0.444974	35.5457	37.5648		ovary	DESeq2	0.42898	0.327664	22	25.6992				ovary	DESeq2						ovary	DESeq2
	Pearson	0.525412	0.477689	30.4128	32.2353			Pearson	0.475886	0.419587	21	24.3534					Pearson	0.0517507	0.0255063	16.9535	18.9997			Pearson	-0.0444958	0.141179	13	13.2222
	Dev	-0.124562	-0.149641	25.324	26.8677			Dev	-0.057689	-0.0154649	24	25.3985					Dev	0.121795	0.0942033	22.8267	22.7418			Dev	-0.143812	-0.161033	27	28.5278
	deMagalhaes	0.268084	0.254844	26.8182	31.3609			deMagalhaes	0.126431	0.168594	24	25.2256					deMagalhaes	-0.232963	-0.249186	95.2425	114.828			deMagalhaes	-0.0524258	-0.0442059	49	46.3889
	GenAge	0.499459	0.448757	46.8006	50.5252			GenAge	0.179972	0.21044	26	25.3985					GenAge	-0.0639985	-0.123799	66.0945	64.3638			GenAge	-0.232705	-0.182626	31	32.4074
	GTExAge	0.584985	0.570234	20.7607	21.4246			GTExAge	0.314656	0.303981	23	24.2707					GTExAge	-0.0668838	-0.0854613	489.058	482.56			GTExAge	0.25735	0.341749	11	12.1852
	Peters	0.490589	0.466737	21.6303	24.7346			Peters	0.158534	0.157013	26	25.5113					Peters	-0.36931	-0.36269	116.406	172.417			Peters	0.285512	0.32827	10	12.25
	all	0.485104	0.433994	30.0665	30.4618			all									all	0.0112124	0.00370845	23.8515	27.6862			all
pancreas	DESeq2	0.434928	0.409919	20.9906	25.1289		pancreas	DESeq2	0.584417	0.604014	22	23.2632				pancreas	DESeq2						pancreas	DESeq2
	Pearson	0.571259	0.574474	22.5589	22.1069			Pearson	0.372709	0.444985	25	24.0451					Pearson	0.196956	0.158045	9.16324	10.9484			Pearson	0.0238701	-0.00742258	15.5	15.6122
	Dev	0.57225	0.570027	47.8298	43.6765			Dev	0.300025	0.332016	21	28.0376					Dev	0.203852	0.183122	30.4991	30.5548			Dev	0.155361	0.116905	21	23.9235
	deMagalhaes	0.252186	0.270993	24.7573	25.3451			deMagalhaes	0.140638	0.0992553	26	25.2406					deMagalhaes	-0.0192057	-0.00742004	53.6849	70.6171			deMagalhaes	-0.016672	-0.0337197	49	42.8316
	GenAge	0.204607	0.189765	57.1078	57.8139			GenAge	-0.30571	-0.311066	28	26.0977					GenAge	0.108078	0.108981	70.2449	67.7749			GenAge	-0.0696194	-0.031326	16.5	17.2755
	GTExAge	0.64026	0.633279	18.2558	20.8395			GTExAge	0.446869	0.457834	26	25.188					GTExAge	0.122943	0.106874	93.4178	113.058			GTExAge	-0.0524364	0.0413415	7	9.29082
	Peters	0.136389	0.111428	33.0042	38.5818			Peters	-0.00456886	0.0132255	28	25.9398					Peters	0.0284914	0.023551	204.717	231.329			Peters	0.164121	0.162619	14.5	15.2194
	all	0.689613	0.703609	21.9225	21.2157			all									all	0.125265	0.129164	22.7282	26.4627			all
pituitary	DESeq2	-0.175364	-0.101111	25.1042	28.0874		pituitary	DESeq2	0.106465	0.0952409	27	25.782				pituitary	DESeq2						pituitary	DESeq2
	Pearson	-0.129702	-0.0375882	25.608	27.2506			Pearson	0.0175114	-0.0228459	24	25.4962					Pearson	0.118352	0.0117902	15.9733	18.999			Pearson	0.105762	0.0397519	54	47.2683
	Dev	0.562052	0.551274	24.7689	26.2842			Dev	0.19638	0.190519	21	25.8421					Dev	-0.00766933	-0.120423	59.8955	60.5689			Dev	0.0710721	-0.0399355	36	40.1057
	deMagalhaes	0.0520485	0.0591375	24.5608	29.4777			deMagalhaes	-0.227046	-0.214282	24	28.188					deMagalhaes	-0.172682	-0.198394	171.378	167.495			deMagalhaes			59	56.3902
	GenAge	-0.108141	0.0145108	26.9013	26.322			GenAge	0.0089248	0.0751276	26	27.0902					GenAge	-0.0279146	0.119145	40.8552	51.0355			GenAge	-0.028748	-0.0533721	23	24.0732
	GTExAge	-0.380128	-0.35459	29.5059	30.3325			GTExAge	0.320494	0.353061	25	25.5414					GTExAge	0.093439	0.142519	392.076	393.192			GTExAge	0.0906771	0.0955308	58	55.1626
	Peters	-0.178461	-0.16444	28.2871	30.3569			Peters	0.206164	0.1899	24	26.1955					Peters	0.0761277	0.0813987	451.754	497.942			Peters	-0.0196501	-0.035785	17	19.6341
	all	-0.0710013	-0.0158552	23.8376	25.5906			all									all	0.0240475	0.00992471	92.181	92.5262			all
prostate	DESeq2	0.522612	0.510083	27.2993	29.0652		prostate	DESeq2	0.134613	0.169389	27	25.5639				prostate	DESeq2						prostate	DESeq2
	Pearson	0.360092	0.395153	22.0079	26.8775			Pearson	0.184839	0.252721	26	25.4511					Pearson	0.303938	0.322379	21.6899	26.8117			Pearson	0.230984	0.221042	30.5	32.8814
	Dev	0.458705	0.3834	22.6048	26.4466			Dev	-0.138782	-0.144568	28	26.3383					Dev	0.377982	0.38009	45.8463	46.6421			Dev	0.130753	-0.135012	31	32.5678
	deMagalhaes	0.345505	0.34549	25.3779	25.8742			deMagalhaes	0.125743	0.330133	24	26.985					deMagalhaes	-0.0256837	0.0177693	70.1012	94.6847			deMagalhaes	0.109394	0.127631	50	47.7288
	GenAge	0.383642	0.373716	29.2774	29.8054			GenAge	0.0913319	0.0820053	28	25.9323					GenAge	0.369323	0.387043	109.79	106.213			GenAge	0.145292	0.352467	28	29.9661
	GTExAge	0.603104	0.616952	20.1484	23.501			GTExAge	0.212889	0.226743	27	25.2406					GTExAge	0.0468984	0.0428318	221.74	229.11			GTExAge	0.146876	0.140275	47	42.5
	Peters	0.0843441	0.0972053	24.4657	27.0865			Peters	0.256852	0.297002	28	25.6391					Peters	0.0739462	0.0520179	398.139	442.788			Peters	-0.0409803	-0.22618	24.5	27.0847
	all	0.527799	0.485733	22.5362	24.2954			all									all	0.3257	0.346155	30.7809	37.2376			all
salivary_gland	DESeq2	0.470539	0.422565	24.9224	24.763		salivary_gland	DESeq2	0.336823	0.342701	21	22.7068				salivary_gland	DESeq2						salivary_gland	DESeq2
	Pearson	-0.0561543	-0.0366009	36.1928	42.4244			Pearson	0.508765	0.309913	21	25.782					Pearson	0.450534	0.432458	37.2945	38.0463			Pearson	0.164073	0.139664	20.5	21.9286
	Dev	0.0919395	0.137704	27.051	25.7299			Dev	0.246163	0.252254	24	27.9624					Dev	0.146067	0.1204	40.0968	40.1654			Dev	-0.103314	-0.161487	30.5	32.4429
	deMagalhaes	-0.257369	-0.369126	26.5397	28.4051			deMagalhaes	0.0727803	0.290763	24	27.7744					deMagalhaes	-0.412387	-0.394351	287.95	301.071			deMagalhaes	-0.315768	-0.315901	44.5	38.1286
	GenAge	-0.432939	-0.448617	132.314	130.543			GenAge	-0.064108	-0.0778723	28	26.188					GenAge	-0.0609917	-0.0764253	83.0563	87.3592			GenAge	-0.172799	-0.224098	23	26.5
	GTExAge	0.497058	0.476039	24.8128	25.2141			GTExAge	0.208446	0.195911	26	26.0602					GTExAge	0.117761	0.0409271	215.15	235.497			GTExAge			52	50.8857
	Peters	0.0741489	0.0887687	34.514	35.1533			Peters	-0.0346294	-0.0458646	26	27.0075					Peters	0.0289761	0.0693852	388.214	386.974			Peters	0.16203	0.15733	15	16.9286
	all	0.351062	0.341781	26.1324	30.4879			all									all	0.272913	0.291026	71.7752	71.9894			all
skin	DESeq2	0.38791	0.329553	20.5259	22.4225		skin	DESeq2	0.183769	0.192675	28	25.7143				skin	DESeq2						skin	DESeq2
	Pearson	0.567975	0.562601	20.6834	21.1079			Pearson	0.229466	0.313135	26	26.2256					Pearson	0.0387807	0.0907867	49.8696	48.4597			Pearson	-0.0319421	-0.0417174	23	24.4871
	Dev	0.58052	0.584609	20.0521	27.0702			Dev	-0.122675	-0.135548	28	26.0075					Dev	0.00949216	-0.0315607	24.1585	25.7679			Dev	-0.0293357	-0.0459607	27	28.8146
	deMagalhaes	0.494285	0.459597	24.331	23.6693			deMagalhaes	0.126979	0.097848	28	26.1579					deMagalhaes	-0.0881696	-0.110005	52.0155	75.9309			deMagalhaes	0.0194699	0.0191419	48	39.9969
	GenAge	0.0809011	0.0713573	28.2817	31.9427			GenAge			29	26.188					GenAge	-0.0717892	-0.0745126	67.0931	77.6677			GenAge	-0.0685669	-0.0880936	25	27.9773
	GTExAge	0.385569	0.375963	22.9395	23.4343			GTExAge	0.0049243	0.00779785	28	26.0526					GTExAge	0.189478	0.204575	182.518	170.21			GTExAge	0.0157875	0.00368018	52	48.7425
	Peters	0.4099	0.406804	23.2004	22.9834			Peters	0.18123	0.191048	29	26.1579					Peters	0.0538014	0.0454072	878.792	695.753			Peters	-0.0240618	-0.0382322	18	18.7652
	all	0.342653	0.321056	25.0323	24.383			all									all	0.0877104	0.111213	71.3589	63.7622			all
small_intestine	DESeq2	0.253016	0.241328	54.8899	55.08		small_intestine	DESeq2	0.163972	0.150353	26	27.1128				small_intestine	DESeq2						small_intestine	DESeq2
	Pearson	0.503144	0.500228	21.846	26.7651			Pearson	0.339252	0.345045	28	26.0827					Pearson	0.149029	0.149707	66.9348	68.4491			Pearson	-0.0455413	-0.0551667	34	35.9515
	Dev	0.536799	0.478661	24.1566	24.4415			Dev	0.00471856	-0.0400246	24	28.218					Dev	-0.00720383	0.0351972	36.5983	36.0368			Dev	-0.226414	-0.0826764	33	34.9903
	deMagalhaes	0.540859	0.552633	23.3965	24.5203			deMagalhaes	0.33733	0.361788	26	25.5414					deMagalhaes	-0.182591	-0.155098	566.056	492.361			deMagalhaes	-0.198859	-0.0598167	21	25.534
	GenAge	0.468833	0.458158	24.1967	24.3229			GenAge			26	25.594					GenAge	-0.0428643	-0.00307185	69.5986	74.1948			GenAge	-0.160922	0.0639863	31	32.0097
	GTExAge	0.488336	0.535278	35.6678	35.6119			GTExAge	0.362383	0.446959	28	25.0451					GTExAge	-0.0462439	-0.043506	190.492	228.221			GTExAge	0.0132877	0.00973774	49	45.068
	Peters	0.323205	0.290894	23.2208	23.8757			Peters	0.347358	0.336168	26	25.3233					Peters	-0.112576	-0.110565	1999.28	2014.4			Peters	0.109118	-0.0274449	11	13.2427
	all	0.444219	0.405227	26.6907	29.2171			all									all	0.186551	0.204336	84.3274	85.6608			all
spleen	DESeq2	0.288307	0.309826	24.4675	29.2461		spleen	DESeq2	-0.348017	-0.343074	29	26.985				spleen	DESeq2						spleen	DESeq2
	Pearson	0.41161	0.423942	20.9879	23.938			Pearson	-0.170638	-0.186733	25	25.8421					Pearson	0.0819758	0.03404	66.261	67.5335			Pearson	0.0669395	0.0285114	34	35.7712
	Dev	0.52488	0.481975	23.5035	24.972			Dev	0.473779	0.46179	24	25.985					Dev	0.191267	0.233079	21.5265	22.8669			Dev	-0.0495628	-0.0309816	33	34.5678
	deMagalhaes	0.612028	0.635381	26.4859	24.5824			deMagalhaes	0.0752268	0.0782336	27	26.4662					deMagalhaes	-0.0390393	-0.0273738	909.263	885.56			deMagalhaes	0.0165605	0.0273266	8	11.3136
	GenAge	0.468891	0.457283	24.8082	27.4634			GenAge			26	25.594					GenAge	0.202435	0.139935	56.7939	51.585			GenAge	0.0349341	-0.0070549	33.5	34.4746
	GTExAge	0.592773	0.619118	23.1948	25.8813			GTExAge	0.205237	0.263182	26	24.7669					GTExAge	-0.0348797	-0.0867994	107.883	139.021			GTExAge	0.0981909	0.112719	49	47.4746
	Peters	0.408659	0.342858	28.8148	33.0801			Peters	0.392135	0.409262	25	28.4662					Peters	0.143063	0.130714	2658.77	2555.65			Peters	0.0363152	-0.145091	27	28.4831
	all	0.319353	0.356093	24.375	27.1449			all									all	0.222266	0.241189	51.6657	53.7122			all
stomach	DESeq2	0.112094	0.106785	27.0943	30.4858		stomach	DESeq2	0.0509493	0.114115	26	25.4812				stomach	DESeq2						stomach	DESeq2
	Pearson	-0.0982371	-0.0971058	39.1159	39.983			Pearson	-0.153396	-0.112316	27	25.782					Pearson	0.0783718	0.0559108	25.5035	27.089			Pearson	0.155083	0.123401	28	28.3251
	Dev	0.484845	0.500807	22.2595	23.9121			Dev	0.374466	0.450982	24	25.015					Dev	0.0409669	0.0546054	38.1368	38.9228			Dev	-0.0250029	-0.0394239	34	37.7488
	deMagalhaes	0.49123	0.486269	24.9638	23.3155			deMagalhaes	0.209346	0.211475	28	25.6767					deMagalhaes	-0.0987013	-0.0729378	228.694	247.069			deMagalhaes	-0.046884	-0.000507318	20	25.0788
	GenAge	0.0652796	0.0581757	41.3408	40.9558			GenAge			28	25.9323					GenAge	0.0400657	0.0580501	34.1285	41.1617			GenAge	-0.00836736	0.0298539	28	28.6601
	GTExAge	0.486506	0.515469	33.6228	34.9816			GTExAge	0.173802	0.1577	29	25.8872					GTExAge	0.0137992	0.011547	266.233	250.518			GTExAge	0.0975407	0.0823369	43	38.2365
	Peters	0.343119	0.320936	25.0487	24.1192			Peters	0.284424	0.267009	27	25.5489					Peters	-0.00736633	-0.00713489	551.089	584.25			Peters	0.0421986	0.0447795	16	18.335
	all	0.234727	0.23579	50.1212	48.4954			all									all	0.0338854	0.00888237	70.5148	72.5678			all
testis	DESeq2	0.363778	0.370394	21.622	25.2779		testis	DESeq2	0.179043	0.182061	24	25.7895				testis	DESeq2						testis	DESeq2
	Pearson	0.347263	0.341988	23.8837	23.1003			Pearson	0.280678	0.266322	24	24.5714					Pearson	-0.0404531	0.0265211	84.4458	79.6195			Pearson	-0.0851204	0.00876924	32	33.8955
	Dev	0.115309	0.0890978	24.1604	26.7722			Dev	0.134268	0.164933	25	27.3158					Dev	0.216733	0.176711	33.6503	33.3795			Dev	-0.0243512	-0.0232294	33	35.0896
	deMagalhaes	0.220258	0.233154	44.0603	44.7264			deMagalhaes	-0.0191139	-0.0397306	27	26.3459					deMagalhaes	0.0115447	-0.0623567	164.557	161.325			deMagalhaes			51	49.4279
	GenAge	-0.297304	-0.298241	84.5412	87.6353			GenAge	-0.175212	-0.19172	28	26.6165					GenAge	0.0990705	0.0206922	87.443	85.4339			GenAge	0.0269258	-0.0461677	30	31.8358
	GTExAge	0.301075	0.291195	78.7485	74.0459			GTExAge	0.0740572	0.135382	27	26.406					GTExAge	-0.0264907	-0.0706281	233.342	233.68			GTExAge	-0.105279	-0.0143935	11	14.0199
	Peters	0.0379761	-0.00898249	28.5785	28.262			Peters	0.0682378	0.0835152	27	26.218					Peters	-0.00157858	-0.0199411	303.189	306.873			Peters	-0.0258545	0.124088	25	27.0896
	all	0.336733	0.31066	30.2653	33.1512			all									all	-0.00610076	0.067184	163.031	155.195			all
thyroid	DESeq2	0.287167	0.276281	46.4291	47.9253		thyroid	DESeq2	0.0709943	-0.00793338	26	26.5564				thyroid	DESeq2						thyroid	DESeq2
	Pearson	0.167491	0.129571	47.6189	46.2457			Pearson	0.110585	0.157702	25	24.9098					Pearson	0.129231	0.10888	80.0932	79.0334			Pearson	-0.151729	-0.129292	21	23.6861
	Dev	0.0239673	0.0143909	26.0405	26.0968			Dev	-0.0353233	-0.00269466	26	29.6241					Dev	0.0157182	0.0104882	27.4091	28.5221			Dev	-0.0363251	-0.212122	28	30.5639
	deMagalhaes	-0.225591	-0.223067	29.7624	36.0794			deMagalhaes	-0.297965	-0.33204	28	27.7519					deMagalhaes	-0.19452	-0.217751	120.083	136.094			deMagalhaes	0.0410642	0.0373622	53.5	51.1361
	GenAge	-0.332593	-0.345671	74.5469	73.3835			GenAge	-0.324936	-0.338298	27	27.1805					GenAge	0.0166481	0.115331	43.3185	46.1632			GenAge	-0.0686702	0.0460199	26	28.1611
	GTExAge	-0.0534357	-0.0566782	27.5518	29.7569			GTExAge	0.00653655	0.112603	26	27.9023					GTExAge	0.154988	0.139807	344.818	330.604			GTExAge	-0.110184	-0.139959	42.5	37.125
	Peters	-0.0910027	-0.148261	26.9622	26.8376			Peters	-0.22002	-0.0966948	27	26.9699					Peters	0.0208975	0.0399467	331.258	421.608			Peters	0.18003	0.144415	16	17.2889
	all	0.236244	0.202959	50.353	50.3968			all									all	0.162267	0.153552	109.071	109.746			all
uterus	DESeq2	0.25438	0.130643	24.5528	26.9149		uterus	DESeq2	0.246197	0.297747	24	25.0301				uterus	DESeq2						uterus	DESeq2
	Pearson	-0.0317862	-0.0292996	25.8894	25.9666			Pearson	0.279499	0.319719	25	24.9323					Pearson	0.195492	0.236897	26.576	27.5573			Pearson	-0.356891	-0.380652	32	32.9222
	Dev	0.121443	0.124584	24.2546	30.7233			Dev	0.0721922	0.0809286	24	25.8722					Dev	-0.0279695	-0.0378617	31.4464	31.2881			Dev	-0.312114	-0.419278	33	33.2
	deMagalhaes	0.316647	0.270332	22.7644	26.6224			deMagalhaes	-0.194768	-0.294905	26	26.391					deMagalhaes	-0.237772	-0.24884	104.349	122.687			deMagalhaes	-0.0359213	-0.0191437	48	44.0111
	GenAge	0.000923156	0.0156664	26.6807	26.5163			GenAge	-0.185626	-0.217729	26	25.6692					GenAge	0.0326938	0.00849974	44.0675	46.208			GenAge	-0.0969945	0.165791	45	45.6889
	GTExAge	0.407722	0.417636	25.6797	25.1933			GTExAge	0.0736839	0.132911	25	25.5564					GTExAge	-0.223525	-0.293834	348.241	327.652			GTExAge	0.276869	0.31426	21	24.3556
	Peters	-0.122503	-0.14224	25.3105	28.9708			Peters	0.178252	0.197602	26	25.3684					Peters	-0.339345	-0.321475	178.363	193.607			Peters	-0.262266	-0.102215	28	29
	all	0.314454	0.288909	24.6951	24.6102			all									all	0.400587	0.421973	63.4949	62.844			all
vagina	DESeq2	0.360978	0.359187	21.254	27.6043		vagina	DESeq2	0.368114	0.376806	21	24.3083				vagina	DESeq2						vagina	DESeq2
	Pearson	0.334035	0.337176	24.8163	31.222			Pearson	0.358934	0.347562	20	24.812					Pearson	0.201286	0.217852	34.0019	38.7066			Pearson	0.00602186	0.0225185	21	24.9381
	Dev	0.47996	0.39776	23.9588	23.6376			Dev	0.315531	0.300332	25	24.1429					Dev	-0.147161	-0.161479	21.1989	23.2693			Dev	-0.199657	-0.242292	27	28.7113
	deMagalhaes	-0.456642	-0.477904	28.5928	29.7155			deMagalhaes	-0.099822	-0.0777201	29	26.3008					deMagalhaes	-0.0810724	-0.11362	85.8085	107.194			deMagalhaes	-0.0752421	-0.0696704	49	45.6186
	GenAge	0.586142	0.59528	45.7436	47.5121			GenAge	0.233541	0.221373	26	25.4436					GenAge	0.216088	0.192932	60.8402	59.5767			GenAge	0.21809	0.333941	34	35.4742
	GTExAge	0.503562	0.551052	24.8701	28.4722			GTExAge	0.401055	0.407255	21	24.4586					GTExAge	-0.130575	-0.114008	129.235	146.957			GTExAge	0.232104	0.246745	27	32.2474
	Peters	0.328378	0.29184	24.8463	25.3874			Peters	-0.220738	-0.283952	29	26.2932					Peters	0.177444	0.147171	289.857	323.98			Peters	-0.057873	0.201682	24	26.8454
	all	0.46605	0.483888	21.741	22.5225			all									all	0.342239	0.345754	75.4979	77.3473			all
skin_fibroblast	DESeq2	0.215466	0.160552	24.8776	26.9958		skin_fibroblast	DESeq2	0.391895	0.388187	28	25.9699				skin_fibroblast	DESeq2						skin_fibroblast	DESeq2
	Pearson	0.55476	0.529426	22.3329	23.0097			Pearson	0.123512	0.105232	27	26.3609					Pearson	-0.154759	-0.189379	29.6561	29.7927			Pearson	-0.19866	-0.115549	13	16.281
	Dev	0.47158	0.456584	23.6391	24.4569			Dev	0.276003	0.162312	23	24.0301					Dev	-0.00150821	-0.0568063	26.9665	27.671			Dev	-0.0729696	-0.0886923	22	24.1601
	deMagalhaes	0.15348	0.11489	24.6559	25.2248			deMagalhaes			29	26.0602					deMagalhaes	0.137426	0.102378	17.2302	23.3608			deMagalhaes	0.187142	0.157726	9	16.5523
	GenAge	0.132847	0.164328	26.2853	25.4364			GenAge			29	26.0602					GenAge	-0.140082	-0.185416	29.1636	33.5543			GenAge	-0.190758	-0.168691	16	17.4902
	GTExAge	0.468518	0.477705	23.2652	22.277			GTExAge			29	26.0602					GTExAge	0.304583	0.269603	208.18	206.548			GTExAge	0.0434898	0.0696963	49	44.2614
	Peters	0.119828	0.0665587	26.884	26.5933			Peters			29	26.0602					Peters	-0.154081	-0.169574	40.4566	47.8446			Peters	-0.0990217	-0.0846192	15	16.2092
	all	0.408835	0.385265	25.072	23.5559			all									all	-0.0444262	-0.0987898	16.85	20.3121			all
skin_nonfibroblast	DESeq2	0.692377	0.725196	21.8128	20.5262		skin_nonfibroblast	DESeq2	0.153072	0.177783	23	25.8947				skin_nonfibroblast	DESeq2						skin_nonfibroblast	DESeq2
	Pearson	0.656433	0.659344	21.737	27.1485			Pearson	0.431732	0.437341	25	27.4135					Pearson	0.180655	0.180185	56.6228	57.0388			Pearson	-0.00236458	-0.0314691	26	28.2459
	Dev	0.504062	0.510668	29.6567	34.4793			Dev	0.285764	0.448871	24	24.3684					Dev	0.020061	-0.00650249	23.4909	24.9381			Dev	-0.034742	-0.0370259	29	30.9472
	deMagalhaes	0.409563	0.366103	22.3341	26.2495			deMagalhaes	0.263077	0.270768	28	25.5038					deMagalhaes	-0.119046	-0.154434	81.419	100.119			deMagalhaes	-0.0043464	0.000916288	53	50.7903
	GenAge	0.157204	0.151636	47.2901	43.8655			GenAge			29	26.188					GenAge	-0.0510321	-0.0464094	96.5945	97.9919			GenAge	-0.0465727	-0.0651084	31	32.8145
	GTExAge	0.595252	0.576652	42.4519	46.3133			GTExAge	0.291826	0.276906	27	25.1278					GTExAge	0.2122	0.213232	141.597	153.626			GTExAge	0.0186771	-0.000314014	53	50.81
	Peters	0.195579	0.223029	36.4161	37.6988			Peters	0.166976	0.149743	28	26.0226					Peters	0.0838445	0.0645646	984.048	993.986			Peters	-0.00331734	-0.00921227	19	19.9502
	all	0.485301	0.46165	23.3445	22.698			all									all	0.182086	0.191542	81.572	83.7429			all
all_tissues_strategy1	DESeq2						all_tissues_strategy1	DESeq2								all_tissues	DESeq2						all_tissues	DESeq2
	Pearson	0.505913	0.517436	19.1835	25.2685			Pearson	0.413252	0.4436	27	25.1053					Pearson	-0.0387459	-0.041275	37.3756	41.5207			Pearson	-0.0773097	-0.0936597	29	31.3858
	Dev	0.463946	0.418725	25.7804	27.7826			Dev	0.351396	0.365811	19	22.3684					Dev	-0.0465244	-0.0605473	38.2188	40.6875			Dev	-0.0572519	-0.130384	31	33.4472
	deMagalhaes	-0.232196	-0.29194	25.5308	25.8271			deMagalhaes	-0.425832	-0.479223	29	26.5113					deMagalhaes	-0.13519	-0.186139	169.444	241.67			deMagalhaes	-0.0688317	-0.0675521	51	45.1049
	GenAge	0.282103	0.277646	25.749	24.6594			GenAge	0.077742	0.0950126	28	26.4436					GenAge	-0.045521	-0.0659711	67.5675	78.7641			GenAge	-0.101309	-0.116774	29	30.0607
	GTExAge	0.454923	0.43081	22.0695	25.5538			GTExAge	0.116618	0.113919	29	26.0376					GTExAge	-0.0322853	-0.0310068	208.446	269.162			GTExAge	0.0202682	0.02604	44	37.4517
	Peters	0.229988	0.222672	25.4519	25.5436			Peters	-0.0673639	-0.0455019	28	26.3308					Peters	-0.0306473	-0.000772205	450.519	614.724			Peters	0.0869889	0.0857412	17	19.4756
	all	0.590001	0.575859	21.6351	22.3942			all									all	0.1085	0.12325	71.509	71.7242			all
all_tissues_strategy2	DESeq2	0.713132	0.71505	23.1858	22.7062		all_tissues_strategy2	DESeq2	0.615616	0.619681	24.8571	24.6512
	Pearson	0.724457	0.742266	22.7404	22.5302			Pearson	0.633385	0.620415	25.75	24.5701
	Dev	0.674554	0.690386	23.2099	23.8012			Dev	0.567908	0.581442	24.0357	24.4909
	deMagalhaes	0.449171	0.430937	23.735	24.6202			deMagalhaes	-0.0258615	0.0362229	27.3571	25.7645
	GenAge	0.299802	0.304188	22.4359	27.0322			GenAge	0.010579	0.00121208	28.5714	26.0953
	GTExAge	0.630732	0.636514	23.4097	21.3325			GTExAge	0.542226	0.560991	26.8571	25.0905
	Peters	0.588971	0.547207	24.1075	24.5682			Peters	0.536161	0.534388	28	25.583
	all	0.728319	0.738559	25.1863	22.6186			all
